# Supplementary material for: Nanostructured shuriken-like BiVO4 with preferentially exposed {010} facets: preparation, formation mechanism, and enhanced photocatalytic performance
Source: Royal Society of Chemistry journal article supplement (doi:10.1039/c7dt04431c), 2017-12-21
Supplement: c7dt04431c1.pdf [file c7dt04431c1.pdf]

## Supplementary Information

Nanostructured shuriken-like BiVO<sub>4</sub> with preferentially exposed {010} facets:  
preparation, formation mechanism, and enhanced photocatalytic performance

Guosheng Zhao<sup>a,b,c</sup>, Wei Liu<sup>\*,b,d</sup>, Yan Hao<sup>c</sup>, Zhuo Zhang<sup>c</sup>, Qing Li<sup>c</sup>, and Shuliang Zang<sup>\*,a</sup>

<sup>a</sup> College of Chemistry, Liaoning University, Shenyang 110036, China

<sup>b</sup> Key Laboratory of Preparation and Application of Environmental Friendly Materials (Jilin Normal University), Ministry of Education, Changchun 130103, China

<sup>c</sup> College of Chemistry, Jilin Normal University, Siping 136000, China

<sup>d</sup> College of Environmental Science and Engineering, Jilin Normal University, Siping 136000,  
China

E-mail: [slzang51@163.com](mailto:slzang51@163.com) (S. L. Zang);

E-mail: [liuwei0319021@jlnu.edu.cn](mailto:liuwei0319021@jlnu.edu.cn) (W. Liu).

### 1. Preparation of mixed solution of sodium vanadate solution and glycerol solution

0.625 mmol Na<sub>3</sub>VO<sub>4</sub>·12H<sub>2</sub>O was dissolved into 50 mL distilled water to form Na<sub>3</sub>VO<sub>4</sub> solution A with a concentration of 0.0125 mol/L. At this point, the pH value of the unregulated solution A was tested to be 12.01, which was denoted as A<sub>12.01</sub>. Similar with the above process, another nine independent Na<sub>3</sub>VO<sub>4</sub> solutions with the concentration of 0.0125 mol/L were prepared by dissolving 0.625 mmol Na<sub>3</sub>VO<sub>4</sub>·12H<sub>2</sub>O into 50 mL HNO<sub>3</sub> or NaOH solution. The pH values of the nine Na<sub>3</sub>VO<sub>4</sub> solutions were adjusted to 2, 3, 4, 5, 6, 7, 8 and 9, respectively, and the corresponding solutions were named as A<sub>2</sub>, A<sub>3</sub>, A<sub>4</sub>, A<sub>5</sub>, A<sub>6</sub>, A<sub>7</sub>, A<sub>8</sub> and A<sub>9</sub>, respectively. The photographs of the series of A are shown in Fig. S1A.

12.5 mL glycerol (Gly) and 87.5 mL distilled water were mixed to form Gly solution G with the volume fraction of 12.5%. The pH value of the unregulated solution G was tested to be 6.78, which

was denoted as  $G_{6.78}$ . Another nine independent 12.5 mL Gly were mixed respectively with 87.5 mL  $HNO_3$  or 87.5 mL NaOH solution to prepare Gly solution with the volume fraction of 12.5%. The pH values of the nine Gly solutions were adjusted to 2, 3, 4, 5, 6, 7, 8 and 9, respectively, and the corresponding solutions were named as  $G_2$ ,  $G_3$ ,  $G_4$ ,  $G_5$ ,  $G_6$ ,  $G_7$ ,  $G_8$  and  $G_9$ , respectively. The photographs of the series of G are shown in Fig. S1B.

The series of solution A and solution G which have the same pH values were mixed in the same volume to obtain the mixed solution of  $Na_3VO_4$  solution and Gly solution. The as-prepared mixed solutions were expressed as  $A_xG_x-y$ , where x expresses the pH value of solution A and solution G before mixing, and y represents the pH value of the mixed solution. For instance,  $A_2G_2-2.34$  refers to the mixed solution prepared by mixing  $A_2$  with equal volume of  $G_2$ , which pH value was tested to be 2.34. When the unregulated solution  $A_{12.01}$  was mixed with  $G_{6.78}$  in the same volume, the pH value of the mixture was tested to be 9.97, which was named as  $A_{12.01}G_{6.78}-9.97$ . Fig. S1C displays the photographs of the series mixture of  $A_xG_x-y$  and  $A_{12.01}G_{6.78}-9.97$ .

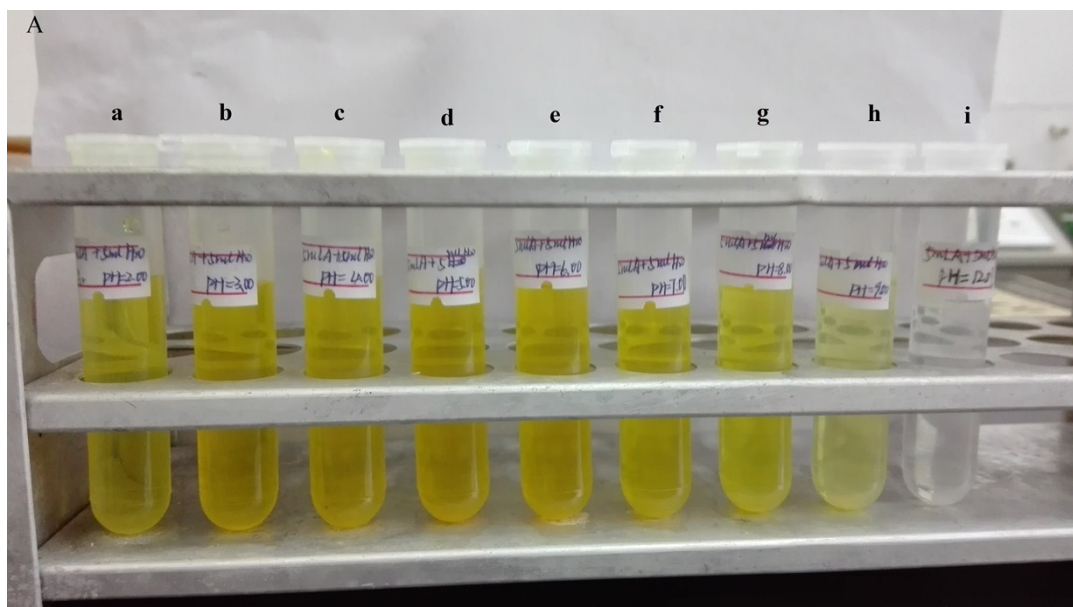

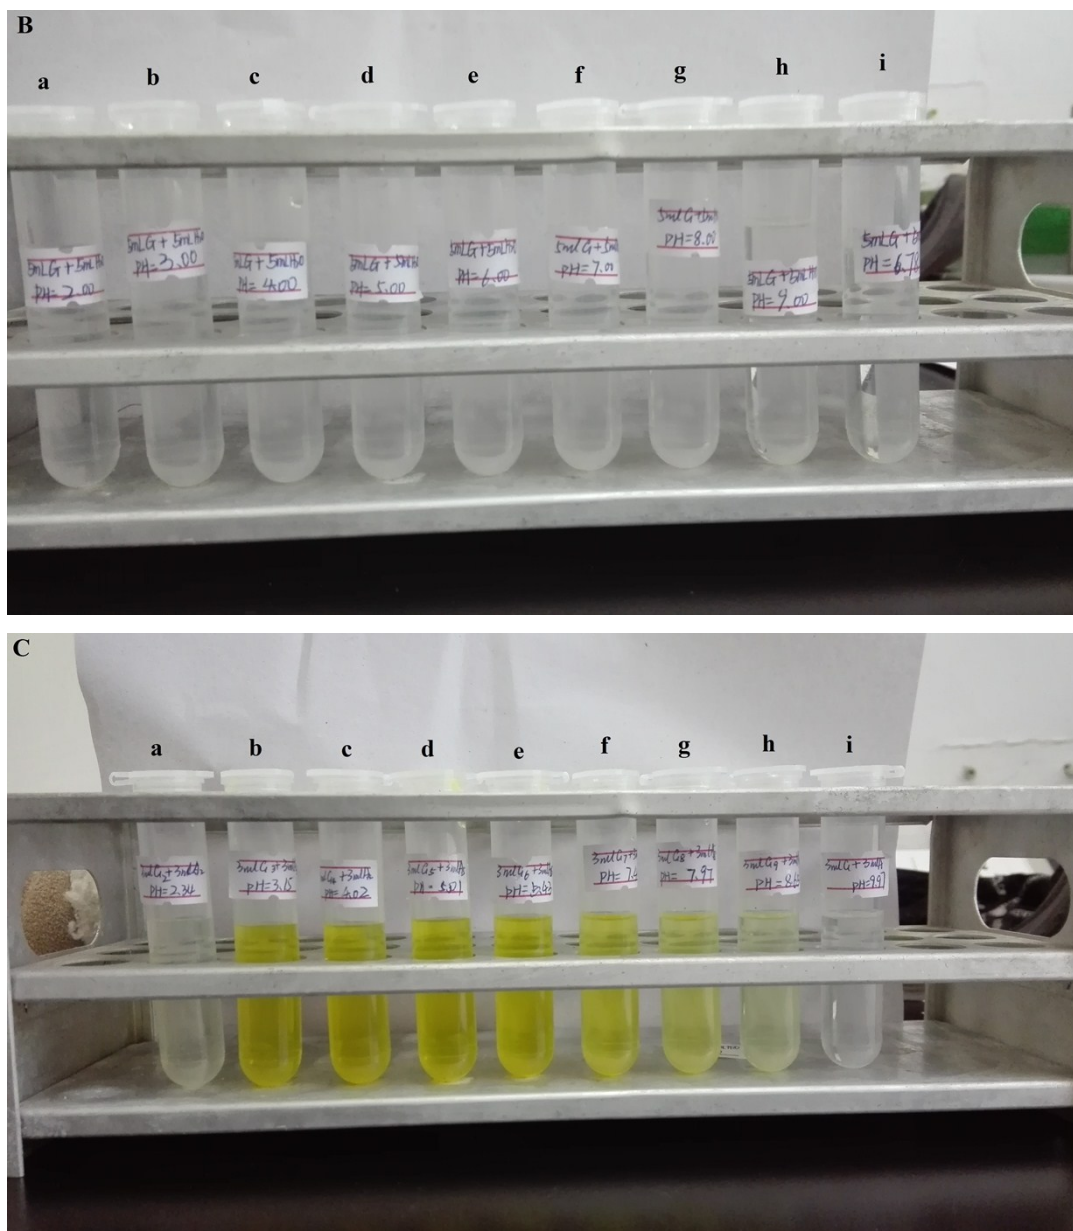

**Fig. S1** (A) Photographs of the series of A. Note, a, b, c, d, e, f, g, h and i in this figure corresponding to  $A_2$ ,  $A_3$ ,  $A_4$ ,  $A_5$ ,  $A_6$ ,  $A_7$ ,  $A_8$ ,  $A_9$  and  $A_{12.01}$ , respectively.  
 (B) Photographs of the series of G. Note, a, b, c, d, e, f, g, h and i in this figure corresponding to  $G_2$ ,  $G_3$ ,  $G_4$ ,  $G_5$ ,  $G_6$ ,  $G_7$ ,  $G_8$ ,  $G_9$  and  $G_{6.78}$ , respectively  
 (C) Photographs of the series mixture of  $A_xG_{x-y}$  and  $A_{12.01}G_{6.78-9.97}$ . Note, a, b, c, d, e, f, g, h and i in this figure corresponding to  $A_2G_2-2.34$ ,  $A_3G_3-3.15$ ,  $A_4G_4-4.02$ ,  $A_5G_5-5.01$ ,  $A_6G_6-5.43$ ,  $A_7G_7-7.43$ ,  $A_8G_8-7.97$ ,  $A_9G_9-8.65$  and  $A_{12.01}G_{6.78-9.97}$ , respectively.

## 2. Preparation of mixed solution of sodium vanadate solution and ethylenediamine tetraacetic acid disodium solution

0.625 mmol ethylenediamine tetraacetic acid disodium (EDTA) was dissolved into 50 mL distilled water to form EDTA solution E with a

concentration of 0.0125 mol/L. At this point, the pH value of the unregulated solution E was tested to be 4.79, which was denoted as E<sub>4.79</sub>. Similar with the above process, another eight independent EDTA solutions with the concentration of 0.0125 mol/L were prepared by dissolving 0.625 mmol EDTA into 50 mL HNO<sub>3</sub> or NaOH solution. The pH values of the eight solutions were adjusted to 3, 4, 5, 6, 7, 8 and 9, respectively, and the corresponding solutions were named as E<sub>3</sub>, E<sub>4</sub>, E<sub>5</sub>, E<sub>6</sub>, E<sub>7</sub>, E<sub>8</sub> and E<sub>9</sub>, respectively. In addition to that, when 0.625 mmol EDTA was dissolved into 50 mL HNO<sub>3</sub> solution and then adjusting the pH value to 2, the final status of the product was white suspension which was named as E<sub>2</sub>. The photographs of the series of E are shown in Fig. S2A.

The series of solution A and solution E which have the same pH values were mixed in the same volume to obtain the mixed solution of Na<sub>3</sub>VO<sub>4</sub> solution and EDTA solution. The as-prepared mixed solutions were expressed as A<sub>x</sub>E<sub>x</sub>-z, where x expresses the pH value of solution A and solution E before mix, and z represents the pH value of the every mixed solution. For instance, A<sub>3</sub>E<sub>3</sub>-2.99 refers to the mixed solution prepared by mixing A<sub>3</sub> with equal volume of E<sub>3</sub>, which pH value was tested to be 2.99. When the unregulated solution A<sub>12.01</sub> was mixed with E<sub>4.79</sub> in the same volume, the pH value of the mixture was tested to be 9.82, which was named as A<sub>12.01</sub>E<sub>4.79</sub>-9.82. After mixing A<sub>2</sub> and E<sub>2</sub>, white solids are completely dissolved, and the mixed solution of Na<sub>3</sub>VO<sub>4</sub> solution and EDTA suspension were obtained, which pH value was tested to be 2.07, and accordingly named as A<sub>2</sub>E<sub>2</sub>-2.07. Fig. S2B displays the photographs of the series mixture of A<sub>x</sub>E<sub>x</sub>-z and A<sub>12.01</sub>E<sub>4.79</sub>-9.82.

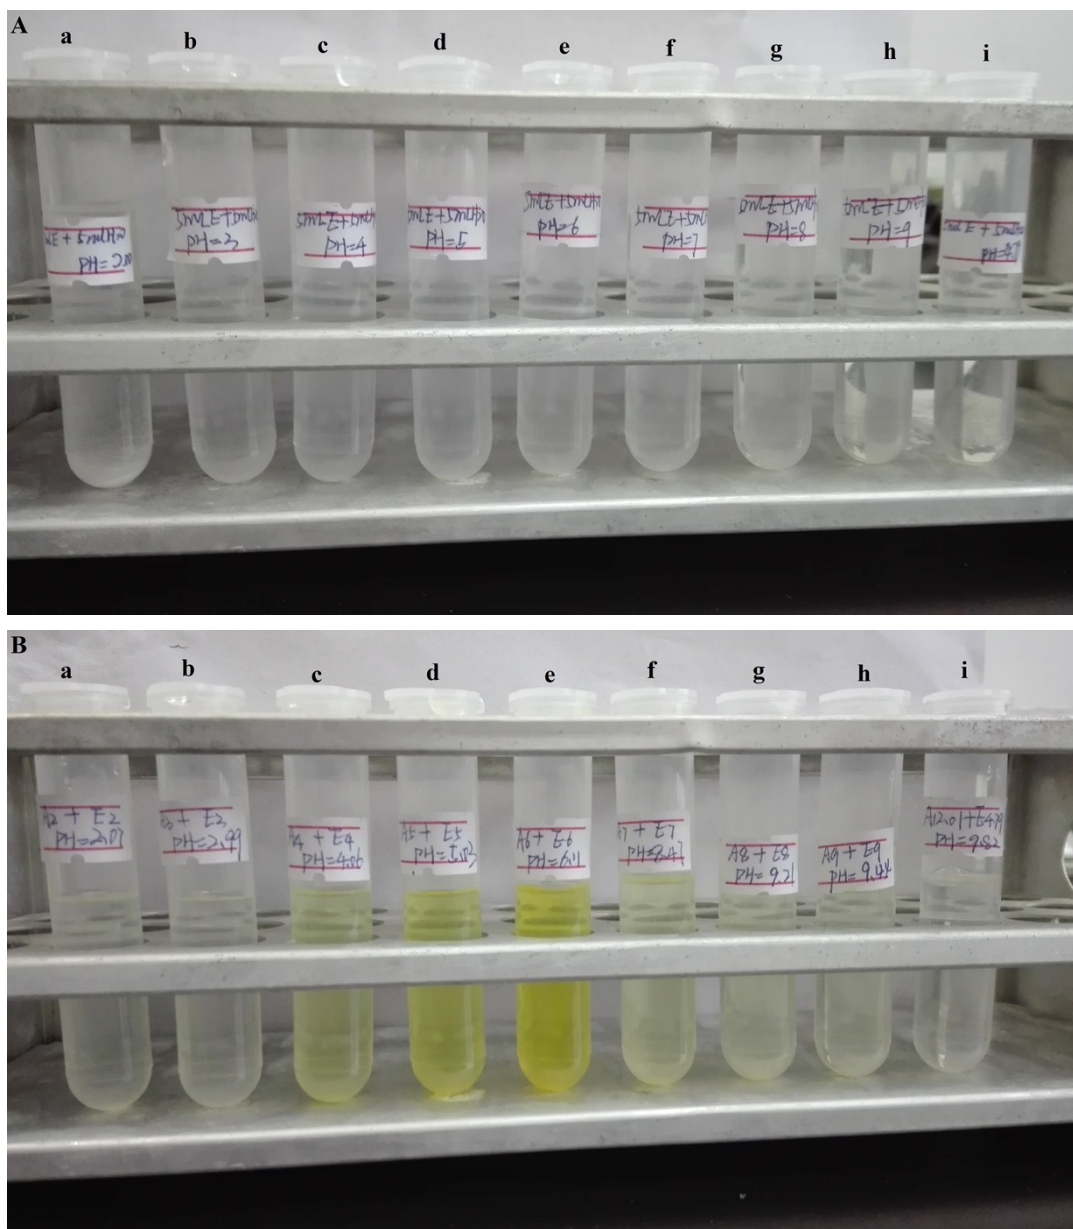

**Fig. S2 (A)** Photographs of the series of E. Note, a, b, c, d, e, f, g, h and i in this figure corresponding to  $E_2$ ,  $E_3$ ,  $E_4$ ,  $E_5$ ,  $E_6$ ,  $E_7$ ,  $E_8$ ,  $E_9$  and  $E_{4.79}$ , respectively.

(B) Photographs of the series mixture of  $A_x E_x-z$  and  $A_{12.01} E_{4.79-9.82}$ . Note, a, b, c, d, e, f, g, h and i in this figure corresponding to  $A_2 E_2-2.07$ ,  $A_3 E_3-2.99$ ,  $A_4 E_4-4.06$ ,  $A_5 E_5-5.03$ ,  $A_6 E_6-6.11$ ,  $A_7 E_7-8.47$ ,  $A_8 E_8-9.21$ ,  $A_9 E_9-9.44$  and  $A_{12.01} E_{4.79-9.82}$ , respectively.
